# Supplementary material for: Nickel/AlMe2Cl-catalysed carbocyanation of alkynes using arylacetonitriles
Source: Royal Society of Chemistry journal article supplement (doi:10.1039/b907290j), 2009-01-01
Supplement: b907290j.pdf [file b907290j.pdf]

*Supporting Information for:*

**Nickel/AlMe<sub>2</sub>Cl-catalysed Carbocyanation of Alkynes Using Arylacetonitriles**

Akira Yada, Tomoya Yukawa, Yoshiaki Nakao,\* and Tamejiro Hiyama\*  
*Department of Material Chemistry, Graduate School of Engineering,  
Kyoto University, Kyoto 615-8510, Japan*

**General.** All manipulations of oxygen- and moisture-sensitive materials were conducted with a standard Schlenk technique or in a dry box under an argon atmosphere. Flash column chromatography was performed using Kanto Chemical silica gel (spherical, 40–50 μm). Analytical thin layer chromatography (TLC) was performed on Merck Kieselgel 60 F<sub>254</sub> (0.25 mm) plates. Visualization was accomplished with UV light (254 nm) and/or an aqueous alkaline KMnO<sub>4</sub> solution followed by heating.

**Apparatus.** Proton and carbon nuclear magnetic resonance spectra (<sup>1</sup>H NMR and <sup>13</sup>C NMR) were recorded on a Varian Mercury 400 spectrometer with Me<sub>4</sub>Si or solvent resonance as the internal standard (<sup>1</sup>H NMR, Me<sub>4</sub>Si at 0 ppm, CHCl<sub>3</sub> at 7.26 ppm, or C<sub>6</sub>D<sub>5</sub>H at 7.16 ppm; <sup>13</sup>C NMR, Me<sub>4</sub>Si at 0 ppm, CDCl<sub>3</sub> at 77.0 ppm, or C<sub>6</sub>D<sub>5</sub>H at 128.0 ppm). <sup>1</sup>H NMR data are reported as follows: chemical shift, multiplicity (s = singlet, d = doublet, t = triplet, q = quartet, quint = quintet, sext = sextet, br = broad, m = multiplet), coupling constants (Hz), and integration. Assignment of the resonances observed in <sup>1</sup>H and <sup>13</sup>C NMR spectra was based on <sup>1</sup>H–<sup>1</sup>H COSY, HMQC, and HMBC 2D NMR experiments. Infrared spectra (IR) recorded on a Shimadzu FTIR-8400 spectrometer are reported in cm<sup>-1</sup>. Melting points (mp) were determined using a YANAKO MP-500D. Elemental analyses were performed by Elemental Analysis Center of Kyoto University. Chiral HPLC analyses were performed with a Shimadzu Prominence chromatograph. Optical rotations were measured on a JASCO DIP-360. High-resolution mass spectra were obtained with a JEOL JMS-700 (EI). X-ray crystal data were collected with a Bruker SMART APEX diffractometer [for (Z)-**3ac**]. Preparative recycling silica gel chromatography was performed with a JAI LC-908 chromatograph equipped with Nacalai Tesque 5SL-II (hexane–ethyl acetate as an eluent). GC analysis was performed on a Shimadzu GC 2014 equipped with an ENV-1 column (Kanto Chemical, 30 m x 0.25 mm, pressure = 31.7 kPa, detector = FID, 290 °C) with helium gas as a carrier.

**Chemicals.** Unless otherwise noted, commercially available chemicals were distilled and degassed before use. Ni(cod)<sub>2</sub> was purchased from Strem and used without further purification. Anhydrous toluene was purchased from Kanto Chemical and degassed by purging vigorously with argon for 20 min and further purified by passage through activated alumina under positive argon pressure as described by Grubbs et al.<sup>1</sup> 2-Mes–C<sub>6</sub>H<sub>4</sub>–PCy<sub>2</sub>,<sup>2</sup> 2-(2,4,6-*i*-Pr<sub>3</sub>–C<sub>6</sub>H<sub>2</sub>)–C<sub>6</sub>H<sub>4</sub>–PCy<sub>2</sub>,<sup>3</sup> 1,4-bis(trimethylsilyl)-2-butyne (**2b**),<sup>4</sup> pyrrolylacenitrile (**1k**),<sup>5</sup> and (*S*)- $\alpha$ -phenylpropionitrile [(*S*)-**1n**] (using (*R,S*)-Josiphos as a ligand)<sup>6</sup> were prepared according to the respective literature procedure.

**Nickel/AlMe<sub>2</sub>Cl-catalyzed carbocyanation of alkynes using arylacetonitriles.** A general procedure. To a stirred mixture of an arylacetonitrile (1.00 mmol), an alkyne (1.00 mmol), and tetradecane (internal standard, 99 mg, 0.50 mmol) in a vial was added a solution of Ni(cod)<sub>2</sub> (5.5 mg, 20 μmol), 2-Mes–C<sub>6</sub>H<sub>4</sub>–PCy<sub>2</sub> (15.7 mg, 40 μmol), and a 1.0 M solution of AlMe<sub>2</sub>Cl in hexane (80 μL, 80 μmol) in toluene (1.0 mL) in a dry box. The vial was taken outside the dry box and stirred at 35 °C

for the time specified in Table 1 and 2. The resulting mixture was filtered through a Florisil pad, concentrated *in vacuo*, and purified by flash column chromatography on silica gel to give the corresponding carbocyanation products in yields listed in Table 1 and 2. Regio- and/or stereoisomers were separated by preparative GPC or HPLC to obtain respective spectra.

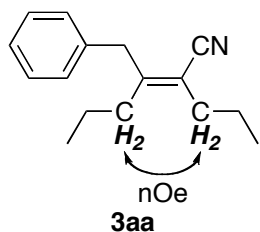

**(Z)-3-Benzyl-2-propyl-2-hexenenitrile (3aa).** A colorless oil,  $R_f$  0.41 (hexane–ethyl acetate = 10:1).  $^1\text{H NMR}$  (400 MHz,  $\text{CDCl}_3$ )  $\delta$  7.30 (tt,  $J = 7.1$ , 1.5 Hz, 2H), 7.27–7.19 (m, 3H), 3.74 (s, 2H), 2.24 (t,  $J = 7.6$  Hz, 2H), 2.04 (t,  $J = 8.0$  Hz, 2H), 1.63 (sext,  $J = 7.5$  Hz, 2H), 1.38 (sext,  $J = 7.6$  Hz, 2H), 0.97 (t,  $J = 7.3$  Hz, 3H), 0.88 (t,  $J = 7.3$  Hz, 3H);  $^{13}\text{C NMR}$  (101 MHz,  $\text{CDCl}_3$ )  $\delta$  157.9, 137.8, 128.7, 128.6, 126.7, 119.6, 111.2, 42.0, 32.7, 31.6, 21.8, 21.3, 14.1, 13.5; IR (neat): 2963, 2932, 2872, 2206, 1624, 1603, 1495, 1454, 1381, 1086, 1030, 737, 702  $\text{cm}^{-1}$ ; Anal. Calcd for  $\text{C}_{16}\text{H}_{21}\text{N}$ : C, 84.53; H, 9.31. Found: C, 84.46; H, 9.39.

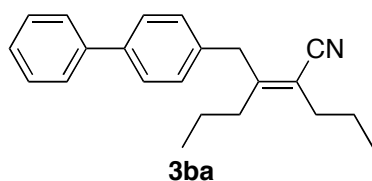

**(Z)-3-(4-Biphenylmethyl)-2-propyl-2-hexenenitrile (3ba).** A colorless oil,  $R_f$  0.41 (hexane–ethyl acetate = 10:1).  $^1\text{H NMR}$  (400 MHz,  $\text{CDCl}_3$ )  $\delta$  7.60–7.56 (m, 2H), 7.53 (dt,  $J = 8.4$ , 2.0 Hz, 2H), 7.44 (t,  $J = 7.6$  Hz, 2H), 7.34 (tt,  $J = 7.4$ , 1.5 Hz, 1H), 7.29 (d,  $J = 8.4$  Hz, 2H), 3.78 (s, 2H), 2.26 (t,  $J = 7.6$  Hz, 2H), 2.09 (t,  $J = 8.0$  Hz, 2H), 1.65 (sext,  $J = 7.5$  Hz, 2H), 1.42 (sext,  $J = 7.6$  Hz, 2H), 0.98 (t,  $J = 7.3$  Hz, 3H), 0.91 (t,  $J = 7.3$  Hz, 3H);  $^{13}\text{C NMR}$  (101 MHz,  $\text{CDCl}_3$ )  $\delta$  157.7, 140.7, 139.6, 136.9, 129.1, 128.7, 127.3, 127.2, 126.9, 119.6, 111.3, 41.6, 32.7, 31.6, 21.7, 21.3, 14.1, 13.5; IR (neat): 3028, 2963, 2932, 2872, 2361, 2343, 2206, 1487, 1458, 1408, 1381, 1009, 910, 735, 698, 421  $\text{cm}^{-1}$ ; Anal. Calcd for  $\text{C}_{22}\text{H}_{25}\text{N}$ : C, 87.08; H, 8.30. Found: C, 87.34; H, 8.36.

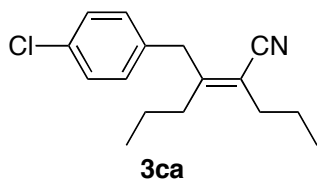

**(Z)-3-[(4-Chlorophenyl)methyl]-2-propyl-2-hexenenitrile (3ca).** A colorless oil,  $R_f$  0.34 (hexane–ethyl acetate = 10:1).  $^1\text{H NMR}$  (400 MHz,  $\text{CDCl}_3$ )  $\delta$  7.27 (dt,  $J = 8.6$ , 2.3 Hz, 2H), 7.14 (dt,  $J = 8.4$ , 2.1 Hz, 2H), 3.70 (s, 2H), 2.24 (t,  $J = 7.6$  Hz, 2H), 2.03 (t,  $J = 7.9$  Hz, 2H), 1.62 (sext,  $J = 7.5$  Hz, 2H), 1.37 (sext,  $J = 7.6$  Hz, 2H), 0.96 (t,  $J = 7.3$  Hz, 3H), 0.89 (t,  $J = 7.3$  Hz, 3H);  $^{13}\text{C NMR}$  (101 MHz,  $\text{CDCl}_3$ )  $\delta$  157.2, 136.3, 132.6, 130.0, 128.7, 119.4, 111.7, 41.2, 32.7, 31.6, 21.7, 21.3, 14.1, 13.4; IR (neat): 2963, 2932, 2872, 2341, 2208, 1624, 1491, 1466, 1408, 1381, 1092, 1016, 912, 800, 735  $\text{cm}^{-1}$ ; Anal. Calcd for  $\text{C}_{16}\text{H}_{20}\text{ClN}$ : C, 73.41, H, 7.70. Found: C, 73.62, H, 7.94.

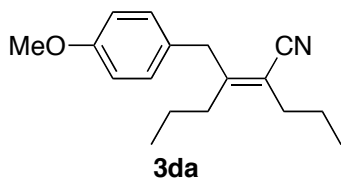

**(Z)-3-[(4-Methoxyphenyl)methyl]-2-propyl-2-hexenenitrile (3da).** A colorless oil,  $R_f$  0.13 (hexane–ethyl acetate = 10:1).  $^1\text{H NMR}$  (400 MHz,  $\text{CDCl}_3$ )  $\delta$  7.13 (dt,  $J = 8.8$ , 2.6 Hz, 2H), 6.83 (dt,  $J = 8.8$ , 2.6 Hz, 2H), 3.79 (s, 3H), 3.67 (s, 2H), 2.23 (t,  $J = 7.6$  Hz, 2H), 2.03 (t,  $J = 8.0$  Hz, 2H), 1.62 (sext,  $J = 7.5$  Hz, 2H), 1.37 (sext,  $J = 7.6$  Hz, 2H), 0.96 (t,  $J = 7.4$  Hz, 3H), 0.88 (t,  $J = 7.3$  Hz, 3H);  $^{13}\text{C NMR}$  (101 MHz,  $\text{CDCl}_3$ )  $\delta$  158.3, 158.2, 129.7, 129.6, 119.6, 113.9, 110.7, 55.1, 41.0, 32.5, 31.5, 21.6, 21.2, 14.0, 13.4; IR (neat): 2963, 2934, 2872, 2835, 2361, 2343, 2206, 1611, 1512, 1464, 1441, 1302, 1250, 1178, 1115, 1036, 816  $\text{cm}^{-1}$ ; Anal. Calcd for  $\text{C}_{17}\text{H}_{23}\text{NO}$ : C, 79.33; H, 9.01. Found: C, 79.50; H, 9.03.

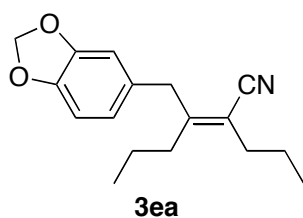

**(Z)-3-[(3,4-Methylenedioxyphenyl)methyl]-2-propyl-2-hexenenitrile (3ea).**

A colorless oil,  $R_f$  0.39 (hexane–ethyl acetate = 10:1).  $^1\text{H NMR}$  (400 MHz,  $\text{CDCl}_3$ )  $\delta$  6.74 (d,  $J = 7.9$  Hz, 1H), 6.69 (d,  $J = 1.8$  Hz, 1H), 6.66 (dd,  $J = 7.9$ , 1.6 Hz, 1H), 5.94 (s, 2H), 3.65 (s, 2H), 2.23 (t,  $J = 7.7$  Hz, 2H), 2.04 (t,  $J = 7.9$  Hz, 2H), 1.62 (sext,  $J = 7.5$  Hz, 2H), 1.37 (sext,  $J = 7.6$  Hz, 2H), 0.97 (t,  $J = 7.3$  Hz, 3H), 0.89 (t,  $J = 7.4$  Hz, 3H);  $^{13}\text{C NMR}$  (101 MHz,  $\text{CDCl}_3$ )  $\delta$  157.9, 147.8, 146.3, 131.4, 121.7, 119.5, 111.1, 108.9, 108.2, 100.9, 41.5, 32.5, 31.5, 21.7, 21.3, 14.1, 13.4; IR (neat): 2963, 2932, 2874, 2206, 1504, 1489, 1443, 1246, 1186, 1097, 1040, 928, 810, 773  $\text{cm}^{-1}$ ; Anal. Calcd for  $\text{C}_{17}\text{H}_{21}\text{NO}_2$ : C, 75.25; H, 7.80. Found: C, 75.45; H, 7.89.

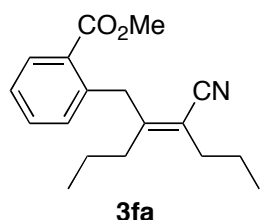

**(Z)-3-[(2-Methoxycarbonylphenyl)methyl]-2-propyl-2-hexenenitrile (3fa).**

A yellow oil,  $R_f$  0.31 (hexane–ethyl acetate = 10:1).  $^1\text{H NMR}$  (400 MHz,  $\text{CDCl}_3$ )  $\delta$  7.88 (dd,  $J = 7.8$ , 1.4 Hz, 1H), 7.44 (td,  $J = 7.6$ , 1.5 Hz, 1H), 7.33–7.22 (m, 2H), 4.22 (s, 2H), 3.91 (s, 3H), 2.26 (t,  $J = 7.6$  Hz, 2H), 1.99 (t,  $J = 8.0$  Hz, 2H), 1.64 (sext,  $J = 7.5$  Hz, 2H), 1.33 (sext,  $J = 7.6$  Hz, 2H), 0.98 (t,  $J = 7.3$  Hz, 3H), 0.84 (t,  $J = 7.6$  Hz, 3H);  $^{13}\text{C NMR}$  (101 MHz,  $\text{CDCl}_3$ )  $\delta$  168.1, 157.8, 139.0, 132.1, 130.8, 130.2, 130.1, 126.7, 119.5, 112.0, 52.2, 38.8, 33.0, 31.7, 21.8, 21.5, 14.1, 13.5; IR (neat): 2963, 2874, 2206, 1720, 1435, 1265, 1192, 1109, 1078, 739  $\text{cm}^{-1}$ ; Anal. Calcd for  $\text{C}_{18}\text{H}_{23}\text{NO}_2$ : C, 75.76; H, 8.12 Found: C, 75.82; H, 8.27.

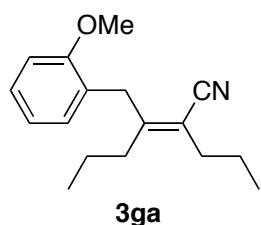

**(Z)-3-[(2-Methoxyphenyl)methyl]-2-propyl-2-hexenenitrile (3ga).**

A colorless oil,  $R_f$  0.30 (hexane–ethyl acetate = 10:1).  $^1\text{H NMR}$  (400 MHz,  $\text{CDCl}_3$ )  $\delta$  7.22 (td,  $J = 8.1$ , 1.8 Hz, 1H), 7.13 (dd,  $J = 7.3$ , 1.6 Hz, 1H), 6.89 (td,  $J = 7.5$ , 1.1 Hz, 1H), 6.85 (d,  $J = 8.2$  Hz, 1H), 3.83 (s, 3H), 3.76 (s, 2H), 2.23 (t,  $J = 7.5$  Hz, 2H), 2.02 (t,  $J = 8.0$  Hz, 2H), 1.61 (sext,  $J = 7.5$  Hz, 2H), 1.37 (sext,  $J = 7.6$  Hz, 2H), 0.96 (t,  $J = 7.3$  Hz, 3H), 0.87 (t,  $J = 7.4$  Hz, 3H);  $^{13}\text{C NMR}$  (101 MHz,  $\text{CDCl}_3$ )  $\delta$  157.8, 157.5, 129.9, 127.9, 126.2, 120.4, 119.6, 110.9, 110.2, 55.1, 35.8, 32.6, 31.6, 21.7, 21.4, 14.1, 13.3; IR (neat): 2963, 2934, 2872, 2837, 2361, 2343, 2206, 1624, 1599, 1587, 1493, 1464, 1439, 1290, 1246, 1123, 1051, 1030, 754  $\text{cm}^{-1}$ ; Anal. Calcd for  $\text{C}_{17}\text{H}_{23}\text{NO}$ : C, 79.33; H, 9.01. Found: C, 79.21; H, 9.18.

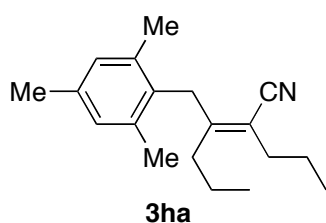

**(Z)-2-Propyl-3-[(2,4,6-trimethylphenyl)methyl]-2-hexenenitrile (3ha).**

A colorless oil,  $R_f$  0.37 (hexane–ethyl acetate = 10:1).  $^1\text{H NMR}$  (400 MHz,  $\text{CDCl}_3$ )  $\delta$  6.84 (s, 2H), 3.82 (s, 2H), 2.27 (s, 6H), 2.26 (s, 3H), 2.22 (t,  $J = 7.7$  Hz, 2H), 1.86 (t,  $J = 8.2$  Hz, 2H), 1.62 (sext,  $J = 7.5$  Hz, 2H), 1.22 (sext,  $J = 7.8$  Hz, 2H), 0.97 (t,  $J = 7.3$  Hz, 3H), 0.81 (t,  $J = 7.3$  Hz, 3H);  $^{13}\text{C NMR}$  (101 MHz,  $\text{CDCl}_3$ )  $\delta$  157.5, 137.3, 136.1, 131.3, 129.2, 119.2, 110.0, 36.4, 32.4, 31.7, 22.1, 21.6, 20.8, 20.4, 14.3, 13.6; IR (neat): 2963, 2932, 2872, 2206, 1614, 1456, 1379, 912, 851, 735  $\text{cm}^{-1}$ ; Anal. Calcd for  $\text{C}_{19}\text{H}_{27}\text{N}$ : C, 84.70; H, 10.10 Found: C, 84.92; H, 10.23.

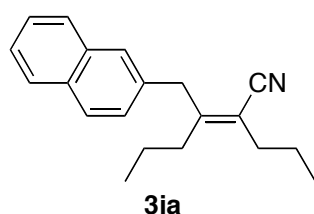

**(Z)-3-(2-Naphthylmethyl)-2-propyl-2-hexenenitrile (3ia).**

A colorless oil,  $R_f$  0.42 (hexane–ethyl acetate = 10:1).  $^1\text{H NMR}$  (400 MHz,  $\text{CDCl}_3$ )  $\delta$  7.86–7.71 (m, 3H), 7.64 (s, 1H), 7.51–7.42 (m, 2H), 7.35 (dd,  $J = 8.4$ , 1.8 Hz, 1H), 3.91 (s, 2H), 2.28 (t,  $J = 7.5$  Hz, 2H), 2.07 (t,  $J = 8.0$  Hz, 2H), 1.66 (sext,  $J = 7.5$  Hz, 2H), 1.41 (sext,  $J = 7.6$  Hz, 2H), 0.99 (t,  $J = 7.3$  Hz, 3H), 0.88 (t,  $J = 7.4$  Hz, 3H);  $^{13}\text{C NMR}$  (101 MHz,  $\text{CDCl}_3$ )  $\delta$  157.7, 135.3, 133.4,

132.3, 128.3, 127.6, 127.5, 127.2, 126.8, 126.1, 125.6, 119.6, 111.4, 42.1, 32.6, 31.6, 21.7, 21.3, 14.0, 13.4; IR (neat): 2963, 2932, 2872, 2206, 1624, 1601, 1508, 1458, 818, 756  $\text{cm}^{-1}$ ; Anal. Calcd for  $\text{C}_{20}\text{H}_{23}\text{N}$ : C, 86.59; H, 8.36. Found: C, 86.50; H, 8.58.

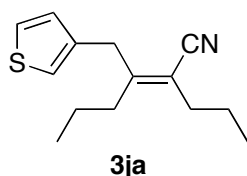

**(Z)-2-Propyl-3-(3-thienylmethyl)-2-hexenenitrile (3ja).** A colorless oil,  $R_f$  0.46 (hexane–ethyl acetate = 10:1).  $^1\text{H}$  NMR (400 MHz,  $\text{CDCl}_3$ )  $\delta$  7.30–7.24 (m, 1H), 7.02 (dd,  $J = 1.8, 0.9$  Hz, 1H), 6.96 (d,  $J = 4.9$  Hz, 1H), 3.73 (s, 2H), 2.23 (t,  $J = 7.7$  Hz, 2H), 2.08 (t,  $J = 8.0$  Hz, 2H), 1.61 (sext,  $J = 7.4$  Hz, 2H), 1.38 (sext,  $J = 7.5$  Hz, 2H), 0.96 (t,  $J = 7.3$  Hz, 3H), 0.90 (t,  $J = 7.4$  Hz, 3H);  $^{13}\text{C}$  NMR (101 MHz,  $\text{CDCl}_3$ )  $\delta$  157.4, 137.7, 127.9, 125.8, 121.7, 119.2, 110.9, 36.6, 32.8, 31.4, 21.6, 21.2, 14.0, 13.3; IR (neat): 2963, 2932, 2872, 2206, 1624, 1464, 1381, 1082, 787, 745  $\text{cm}^{-1}$ ; Anal. Calcd for  $\text{C}_{14}\text{H}_{19}\text{NS}$ : C, 72.05; H, 8.21. Found: C, 72.29; H, 8.11.

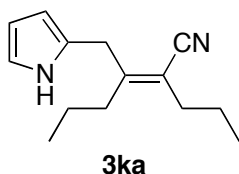

**(Z)-2-Propyl-3-(2-pyrrolylmethyl)-2-hexenenitrile (3ka).** A slightly brown oil,  $R_f$  0.23 (hexane–ethyl acetate = 10:1).  $^1\text{H}$  NMR (400 MHz,  $\text{CDCl}_3$ )  $\delta$  8.14 (br s, 1H), 6.70 (ddd,  $J = 2.7, 1.5, 1.3$  Hz, 1H), 6.12 (dd,  $J = 5.9, 2.7$  Hz, 1H), 6.02–5.96 (m, 1H), 3.69 (s, 2H), 2.20 (t,  $J = 7.7$  Hz, 2H), 2.13 (t,  $J = 7.9$  Hz, 2H), 1.60 (sext,  $J = 7.5$  Hz, 2H), 1.40 (sext,  $J = 7.6$  Hz, 2H), 0.95 (t,  $J = 7.4$  Hz, 3H), 0.91 (t,  $J = 7.3$  Hz, 3H);  $^{13}\text{C}$  NMR (101 MHz,  $\text{CDCl}_3$ )  $\delta$  157.7, 127.5, 119.8, 117.5, 110.6, 108.4, 107.1, 34.4, 33.2, 31.5, 21.7, 21.2, 14.1, 13.5; IR (neat): 3373, 2963, 2932, 2872, 2208, 1624, 1566, 1466, 1381, 1121, 1094, 1026, 912, 883, 795, 716  $\text{cm}^{-1}$ ; Anal. Calcd for  $\text{C}_{14}\text{H}_{20}\text{N}_2$ : C, 77.73; H, 9.32. Found: C, 77.87; H, 9.07.

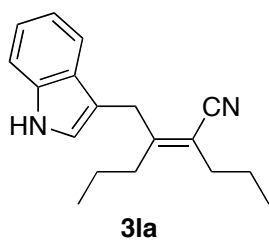

**(Z)-3-(3-Indolylmethyl)-2-propyl-2-hexenenitrile (3la).** A slightly brown oil,  $R_f$  0.24 (hexane–ethyl acetate = 10:1).  $^1\text{H}$  NMR (400 MHz,  $\text{CDCl}_3$ )  $\delta$  8.07 (br s, 1H), 7.65 (d,  $J = 7.9$  Hz, 1H), 7.37 (d,  $J = 8.1$  Hz, 1H), 7.21 (t,  $J = 7.7$  Hz, 1H), 7.14 (t,  $J = 7.5$  Hz, 1H), 7.05 (s, 1H), 3.89 (s, 2H), 2.26 (t,  $J = 7.6$  Hz, 2H), 2.12 (t,  $J = 7.9$  Hz, 2H), 1.65 (sext,  $J = 7.4$  Hz, 2H), 1.43 (sext,  $J = 7.6$  Hz, 2H), 0.98 (t,  $J = 7.3$  Hz, 3H), 0.90 (t,  $J = 7.3$  Hz, 3H);  $^{13}\text{C}$  NMR (101 MHz,  $\text{CDCl}_3$ )  $\delta$  158.4, 136.0, 127.2, 122.4, 122.0, 119.6, 119.5, 118.8, 112.3, 111.0, 110.1, 32.9, 32.1, 31.8, 21.9, 21.6, 14.3, 13.7; IR (neat): 3414, 2963, 2932, 2872, 2206, 1620, 1456, 1433, 1339, 1232, 1094, 1011, 910, 737, 648  $\text{cm}^{-1}$ ; Anal. Calcd for  $\text{C}_{18}\text{H}_{22}\text{N}_2$ : C, 81.16; H, 8.32. Found: C, 81.07; H, 8.33.

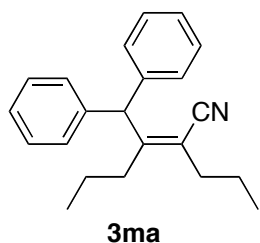

**(Z)-3-(Diphenylmethyl)-2-propyl-2-hexenenitrile (3ma).** A colorless oil,  $R_f$  0.37 (hexane–ethyl acetate = 10:1).  $^1\text{H}$  NMR (400 MHz,  $\text{CDCl}_3$ )  $\delta$  7.35–7.23 (m, 6H), 7.16 (d,  $J = 5.1$  Hz, 4H), 5.70 (s, 1H), 2.28 (t,  $J = 7.7$  Hz, 2H), 2.20 (t,  $J = 8.0$  Hz, 2H), 1.68 (sext,  $J = 7.5$  Hz, 2H), 1.01 (t,  $J = 7.3$  Hz, 3H), 0.73–0.59 (m, 5H);  $^{13}\text{C}$  NMR (101 MHz,  $\text{CDCl}_3$ )  $\delta$  159.5, 140.7, 129.1, 128.4, 126.9, 118.9, 113.1, 57.4, 33.5, 32.1, 22.7, 21.6, 14.6, 13.6; IR (neat): 2963, 2932, 2872, 2206, 1601, 1495, 1454, 1379, 1115, 1078, 1032, 910, 733, 698  $\text{cm}^{-1}$ ; Anal. Calcd for  $\text{C}_{22}\text{H}_{25}\text{N}$ : C, 87.08; H, 8.30. Found: C, 86.85; H, 8.43.

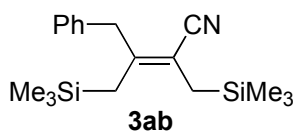

**(Z)-3-Benzyl-4-trimethylsilyl-2-(trimethylsilyl)methyl-2-butenenitrile (3ab).** A colorless oil,  $R_f$  0.25 (hexane–ethyl acetate = 20:1).  $^1\text{H}$  NMR (400 MHz,  $\text{CDCl}_3$ )  $\delta$  7.31 (tt,  $J = 7.1, 1.3$  Hz, 2H), 7.26–7.19 (m, 3H), 3.69 (s, 2H), 1.64 (s, 2H), 1.61 (s, 2H), 0.12 (s, 9H), 0.11 (s, 9H);  $^{13}\text{C}$  NMR (101 MHz,

$\text{CDCl}_3$ )  $\delta$  153.9, 138.4, 128.6, 128.4, 126.5, 121.0, 103.4, 43.7, 24.2, 21.4, -0.2, -0.9; IR (neat): 3063, 3028, 2955, 2899, 2203, 1603, 1495, 1454, 1437, 1418, 1250, 1219, 1173, 1142, 1084, 1030, 957, 847, 762, 727, 700, 610, 552  $\text{cm}^{-1}$ ; Anal. Calcd for  $\text{C}_{18}\text{H}_{29}\text{NSi}_2$ : C, 68.50; H, 9.26. Found: C, 68.73; H, 9.09.

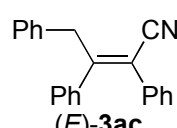**(E)-2,3,4-Triphenyl-2-butenenitrile [(E)-3ac].** A colorless solid, mp = 105.0–106.0 °C,  $R_f$  0.23 (hexane–ethyl acetate = 20:1).  $^1\text{H}$  NMR (400 MHz,  $\text{CDCl}_3$ )  $\delta$  7.26–7.11 (m, 13H), 6.95–6.89 (m, 2H), 4.27 (s, 2H);  $^{13}\text{C}$  NMR (101 MHz,  $\text{CDCl}_3$ )  $\delta$  157.4, 137.5, 136.6, 133.4, 129.4, 128.7, 128.5, 128.4, 128.3, 128.14, 128.09, 126.7, 119.2, 112.8, 44.9; IR (KBr): 3439, 3057, 3028, 2915, 2218, 1966, 1954, 1896, 1881, 1821, 1805, 1755, 1599, 1575, 1493, 1454, 1441, 1431, 1219, 1184, 1107, 1069, 1030, 1001, 976, 945, 926, 910, 854, 833, 773, 750, 702, 677, 637, 600, 561, 517, 488, 461  $\text{cm}^{-1}$ ; Anal. Calcd for  $\text{C}_{22}\text{H}_{17}\text{N}$ : C, 89.46; H, 5.80. Found: C, 89.42; H, 5.74.

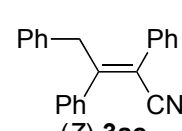**(Z)-2,3,4-Triphenyl-2-butenenitrile [(Z)-3ac].** A yellow solid, mp = 103.5–104.3 °C,  $R_f$  0.15 (hexane–ethyl acetate = 20:1).  $^1\text{H}$  NMR (400 MHz,  $\text{CDCl}_3$ )  $\delta$  7.51–7.32 (m, 10H), 7.22–7.11 (m, 3H), 6.95 (d,  $J$  = 6.6 Hz, 2H), 3.96 (s, 2H);  $^{13}\text{C}$  NMR (101 MHz,  $\text{CDCl}_3$ )  $\delta$  157.8, 138.7, 136.9, 134.0, 129.1, 129.0, 128.83, 128.80, 128.5, 128.4, 128.2, 128.0, 126.4, 119.0, 113.8, 40.0; IR (KBr): 3443, 3061, 3028, 2207, 1981, 1960, 1888, 1809, 1763, 1603, 1591, 1570, 1495, 1445, 1290, 1277, 1244, 1180, 1157, 1074, 1030, 999, 947, 920, 893, 791, 777, 766, 731, 708, 698, 567, 517, 490, 461, 446  $\text{cm}^{-1}$ ; Anal. Calcd for  $\text{C}_{22}\text{H}_{17}\text{N}$ : C, 89.46; H, 5.80. Found: C, 89.29; H, 5.84.

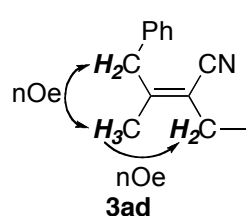

**(Z)-2-Ethyl-3-methyl-4-phenyl-2-butenenitrile (3ad).** A colorless oil,  $R_f$  0.31 (hexane–ethyl acetate = 10:1).  $^1\text{H}$  NMR (400 MHz,  $\text{CDCl}_3$ )  $\delta$  7.34–7.20 (m, 5H), 3.71 (s, 2H), 2.28 (q,  $J$  = 7.6 Hz, 2H), 1.73 (s, 3H), 1.17 (t,  $J$  = 7.6 Hz, 3H);  $^{13}\text{C}$  NMR (101 MHz,  $\text{CDCl}_3$ )  $\delta$  153.3, 137.7, 128.7, 128.6, 126.8, 119.3, 112.0, 44.4, 23.4, 17.6, 12.8; IR (neat): 3028, 2974, 2936, 2876, 2208, 1630, 1603, 1495, 1454, 1377, 752, 704  $\text{cm}^{-1}$ ; HRMS (EI) Calcd for  $\text{C}_{13}\text{H}_{15}\text{N}$ :  $M^+$ , 185.1204. Found:  $m/z$

185.1199.

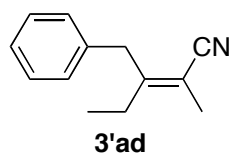

**(Z)-3-Benzyl-2-methyl-2-pentenitrile (3'ad).** A colorless oil,  $R_f$  0.31 (hexane–ethyl acetate = 10:1).  $^1\text{H}$  NMR (400 MHz,  $\text{CDCl}_3$ )  $\delta$  7.34–7.20 (m, 5H), 3.74 (s, 2H), 2.10 (q,  $J$  = 7.6 Hz, 2H), 1.96 (s, 3H), 0.95 (t,  $J$  = 7.7 Hz, 3H);  $^{13}\text{C}$  NMR (101 MHz,  $\text{CDCl}_3$ )  $\delta$  159.5, 137.5, 128.7, 128.5, 126.7, 120.2, 104.5, 41.7, 24.1, 16.1, 12.0; IR (neat): 3028, 2966, 2934, 2874, 2361, 2341, 2208, 1603, 1489, 1454, 1379, 912, 735, 702  $\text{cm}^{-1}$ ; HRMS (EI) Calcd for  $\text{C}_{13}\text{H}_{15}\text{N}$ :  $M^+$ , 185.1204. Found:  $m/z$  185.1196.

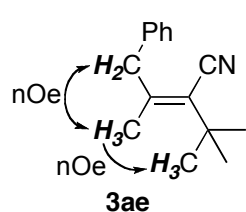

**(Z)-2-tert-Butyl-3-methyl-4-phenyl-2-butenenitrile (3ae).** A colorless oil,  $R_f$  0.43 (hexane–ethyl acetate = 10:1).  $^1\text{H}$  NMR (400 MHz,  $\text{CDCl}_3$ )  $\delta$  7.31 (tt,  $J$  = 7.1, 1.6 Hz, 2H), 7.27–7.19 (m, 3H), 3.76 (s, 2H), 1.91 (s, 3H), 1.33 (s, 9H);  $^{13}\text{C}$  NMR (101 MHz,  $\text{CDCl}_3$ )  $\delta$  154.4, 137.8, 128.6, 128.5, 126.7, 120.4, 119.3, 46.5, 33.6, 30.6, 19.8; IR (neat): 2970, 2206, 1601, 1495, 1454, 1367, 914, 735, 700, 428  $\text{cm}^{-1}$ ; Anal. Calcd for  $\text{C}_{15}\text{H}_{19}\text{N}$ : C, 84.46; H, 8.98. Found: C, 84.55; H, 9.03.

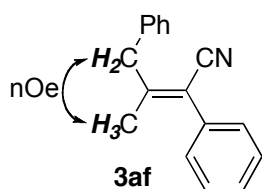

**(Z)-2,4-Diphenyl-3-methyl-2-butenenitrile (3af).** A colorless oil,  $R_f$  0.33 (hexane–ethyl acetate = 10:1).  $^1\text{H}$  NMR (400 MHz,  $\text{CDCl}_3$ )  $\delta$  7.43–7.26 (m, 10H), 3.91 (s, 2H), 1.81 (s, 3H);  $^{13}\text{C}$  NMR (101 MHz,  $\text{CDCl}_3$ )  $\delta$  156.5, 137.3, 133.8, 129.1, 128.73, 128.70, 128.5, 128.3, 126.9, 119.0, 111.6, 44.5, 19.2; IR (neat): 3061, 3028, 2210, 1601, 1493, 1447, 1375, 1076, 1030, 1005, 989, 912, 767, 750, 700  $\text{cm}^{-1}$ ; HRMS (EI) Calcd for  $\text{C}_{17}\text{H}_{15}\text{N}$ :  $M^+$ , 233.1204. Found:  $m/z$  233.1214.

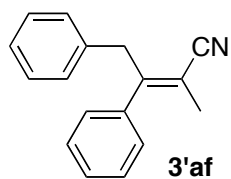

**(E)-3,4-Diphenyl-2-methyl-2-butenenitrile (3'af).** A colorless oil,  $R_f$  0.33 (hexane–ethyl acetate = 10:1).  $^1\text{H}$  NMR (400 MHz,  $\text{CDCl}_3$ )  $\delta$  7.33–7.26 (m, 3H), 7.23–7.14 (m, 3H), 7.07–7.02 (m, 2H), 6.96–6.90 (m, 2H), 4.04 (s, 2H), 1.85 (s, 3H);  $^{13}\text{C}$  NMR (101 MHz,  $\text{CDCl}_3$ )  $\delta$  157.1, 137.4, 136.8, 128.7, 128.3, 128.2, 128.1, 127.6, 126.5, 119.9, 106.5, 44.5, 17.9; IR (neat): 3061, 3028, 2924, 2855, 2361, 2343, 2210, 1601, 1493, 1443, 1375, 1076, 1030, 1005, 912, 779, 766, 735, 702, 565  $\text{cm}^{-1}$ ; HRMS (EI) Calcd for  $\text{C}_{17}\text{H}_{15}\text{N}$ :  $M^+$ , 233.1204. Found:  $m/z$  233.1195.

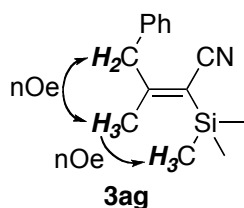

**(E)-3-Methyl-4-phenyl-2-trimethylsilyl-2-butenenitrile (3ag).** A colorless oil,  $R_f$  0.42 (hexane–ethyl acetate = 10:1).  $^1\text{H}$  NMR (400 MHz,  $\text{CDCl}_3$ )  $\delta$  7.32 (tt,  $J$  = 7.2, 1.6 Hz, 2H), 7.28–7.20 (m, 3H), 3.82 (s, 2H), 1.88 (s, 3H), 0.31 (s, 9H);  $^{13}\text{C}$  NMR (101 MHz,  $\text{CDCl}_3$ )  $\delta$  171.5, 137.5, 128.8, 128.7, 126.8, 120.4, 110.0, 46.7, 22.1, –0.4; IR (neat): 3029, 2959, 2901, 2193, 1582, 1495, 1454, 1375, 1254, 1028, 880, 845, 762, 745, 700, 633, 559  $\text{cm}^{-1}$ ; Anal. Calcd for  $\text{C}_{14}\text{H}_{19}\text{NSi}$ : C,

73.30; H, 8.35. Found: C, 73.56; H, 8.37.

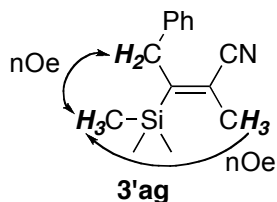

**(E)-2-Methyl-4-phenyl-3-trimethylsilyl-2-butenenitrile (3'ag).** A colorless oil,  $R_f$  0.47 (hexane–ethyl acetate = 10:1).  $^1\text{H}$  NMR (400 MHz,  $\text{CDCl}_3$ )  $\delta$  7.35–7.17 (m 3H), 7.11 (d,  $J$  = 7.0 Hz, 2H), 3.87 (s, 2H), 2.17 (s, 3H), 0.08 (s, 9H);  $^{13}\text{C}$  NMR (101 MHz,  $\text{CDCl}_3$ )  $\delta$  159.3, 137.9, 128.8, 128.4, 126.5, 119.3, 118.8, 43.0, 20.5, –0.4; IR (neat): 3028, 2955, 2901, 2855, 2206, 1587, 1495, 1452, 1254, 1080, 1030, 843, 760, 739, 700  $\text{cm}^{-1}$ ; Anal. Calcd for  $\text{C}_{14}\text{H}_{19}\text{NSi}$ : C,

73.30; H, 8.35. Found: C, 73.56; H, 8.37.

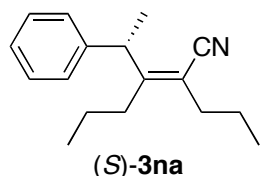

**Nickel/ $\text{AlMe}_2\text{Cl}$ -catalyzed carbocyanation of **2a** using (*S*)-**1n** (Eq. 2).** To a solution of  $\text{Ni}(\text{cod})_2$  (55 mg, 0.2 mmol) and 2-(2,4,6-*i*-Pr<sub>3</sub>-C<sub>6</sub>H<sub>2</sub>)–C<sub>6</sub>H<sub>4</sub>–PCy<sub>2</sub> (191 mg, 40 mmol) in toluene (1.0 mL) was added (*S*)-**1n** (131 mg, 1.00 mmol), a 1.0 M solution of  $\text{AlMe}_2\text{Cl}$  in hexane (0.20 mL, 0.20 mmol), **2a** (0.55 g, 5.0 mmol), and tridecane (internal standard, 92 mg, 0.50 mmol) sequentially in a dry box. The vial was taken outside the dry box and heated at 80 °C for 0.5 h. GC

analysis of the mixture showed the formation of hydrocyanation product **4**, styrene **5**, and hydrocinnamonnitrile **6** in 35%, 44%, and 3% yield, respectively. The mixture was filtered through a silica gel pad, concentrated *in vacuo*, and purified by flash column chromatography on silica gel followed by preparative HPLC to give (*S*)-(*Z*)-3-(1-phenylethyl)-2-propyl-2-hexenenitrile [(*S*)-**3na**] (54 mg, 22%) and (*S*)-**1n** (17 mg, 13%). (*S*)-**3na**: A colorless oil,  $R_f$  0.27 (hexane–ethyl acetate = 10:1).  $^1\text{H}$  NMR (400 MHz,  $\text{CDCl}_3$ )  $\delta$  7.35–7.20 (m, 5H), 4.46 (q,  $J$  = 7.1 Hz, 1H), 2.18 (t,  $J$  = 7.6 Hz, 2H), 1.91 (t,  $J$  = 8.2 Hz, 2H), 1.64 (sext,  $J$  = 7.5 Hz, 2H), 1.47 (d,  $J$  = 7.1 Hz, 3H), 1.27–1.09 (m, 1H), 0.96 (t,  $J$  = 7.4 Hz, 3H), 0.91–0.73 (m, 4H);  $^{13}\text{C}$  NMR (101 MHz,  $\text{CDCl}_3$ )  $\delta$  162.7, 141.6, 128.3, 127.4, 126.8, 119.3, 110.2, 45.6, 31.7, 30.9, 23.1, 21.5, 17.1, 14.6, 13.5; IR (neat): 2964, 2934, 2874, 2206, 1601, 1495, 1450, 1379, 1123, 1090, 1022, 912, 735, 700  $\text{cm}^{-1}$ ; Anal. Calcd for  $\text{C}_{17}\text{H}_{23}\text{N}$ : C, 84.59; H, 9.60.

Found: C, 84.78; H, 9.59. The enantiomeric excess (ee) was determined by HPLC analysis on a Daicel Chiralcel OB-H column with hexane, flow rate = 0.5 ml/min, detection at 254 nm. Retention times: 14.5 min [(*S*)-enantiomer], 17.2 min [(*R*)-enantiomer]. 41% ee.  $[\alpha]_D^{30} -145.97$  (*c* 1.055 in toluene). (*S*)-**1n**: The ee was determined by HPLC analysis on a Daicel Chiralcel OD-H column with hexane, flow rate = 0.5 ml/min, detection at 258 nm. Retention times: 37.4 min [(*S*)-enantiomer], 43.8 min [(*R*)-enantiomer]. 80% ee.

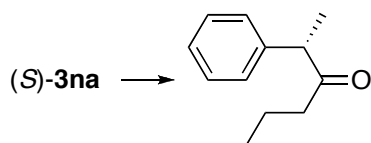

**Ruthenium catalyzed oxidation of (*S*)-**3na**.** To a solution of (*S*)-**3na** (42 mg, 0.18 mmol) in  $\text{CCl}_4\text{-CH}_3\text{CN-H}_2\text{O}$  (1.0:1.0:1.5, 1.4 mL) was added  $\text{NaIO}_4$  (0.38 g, 1.6 mmol) and  $\text{RuCl}_3\cdot 3\text{H}_2\text{O}$  (2.1 mg, 7.9  $\mu\text{mol}$ ) at 0 °C, and the resulting mixture was stirred at rt for 5 h. Water was added, and the resulting aqueous layer was extracted with  $\text{CH}_2\text{Cl}_2$ . The

combined organic layers were dried over  $\text{MgSO}_4$ , concentrated *in vacuo*, and purified by flash column chromatography on silica gel to give (*S*)-2-phenyl-3-hexanone (14 mg, 43%) as a pale yellow oil,  $R_f$  0.20 (hexane–ethyl acetate = 30:1).  $^1\text{H NMR}$  (400 MHz,  $\text{CDCl}_3$ )  $\delta$  7.35–7.30 (m, 2H), 7.28–7.19 (m, 3H), 3.75 (q,  $J = 7.0$  Hz, 1H), 2.33 (t,  $J = 7.5$  Hz, 2H), 1.58–1.47 (m, 2H), 1.40 (d,  $J = 7.0$  Hz, 3H), 0.80 (t,  $J = 7.4$  Hz, 3H);  $^{13}\text{C NMR}$  (101 MHz,  $\text{CDCl}_3$ )  $\delta$  210.6, 140.6, 128.7, 127.7, 126.9, 53.0, 43.0, 17.6, 17.4, 13.7; IR (neat): 3028, 2964, 2932, 2874, 1713, 1601, 1493, 1452, 1373, 1130, 1070, 1015, 762, 700  $\text{cm}^{-1}$ ; HRMS (EI) Calcd for  $\text{C}_{12}\text{H}_{16}\text{O}$ :  $M^+$ , 176.1201. Found:  $m/z$  176.1203. The ee was determined by HPLC analysis on a Daicel Chiralcel OD-H column with hexane, flow rate = 0.5 ml/min, detection at 254 nm. Retention times: 17.2 min [(*S*)-enantiomer], 18.8 min [(*R*)-enantiomer]. 38% ee.  $[\alpha]_D^{30} +113.51$  (*c* 0.555 in toluene) [lit.<sup>7</sup>  $[\alpha]_D^{20} -234$  (*c* 0.281 in toluene) for 91% ee of (*R*)-enantiomer].

### X-ray structure report for (Z)-3ac.

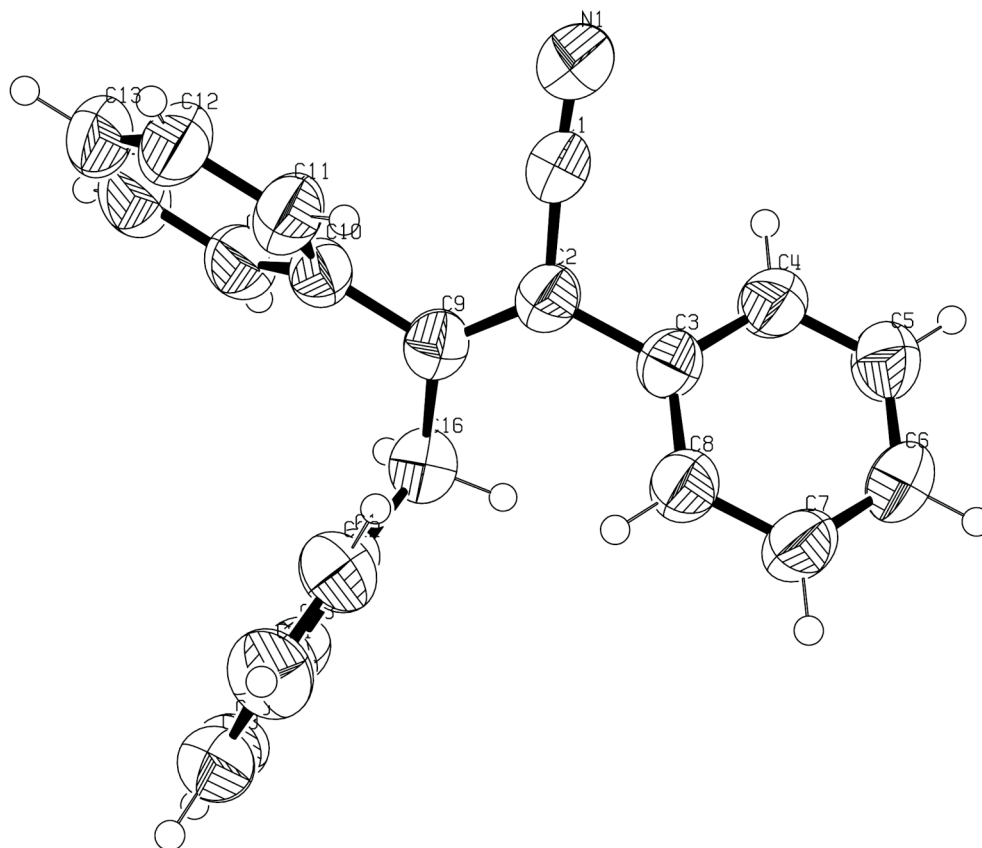

**Table S1.** Crystal data and structure refinement for (Z)-3ac.

|                        |                                   |                  |
|------------------------|-----------------------------------|------------------|
| Empirical formula      | C <sub>22</sub> H <sub>17</sub> N |                  |
| Formula weight         | 295.37                            |                  |
| Temperature            | 300(2) K                          |                  |
| Wavelength             | 0.71073 Å                         |                  |
| Crystal system         | Monoclinic                        |                  |
| Space group            | C2/c                              |                  |
| Unit cell dimensions   | a = 16.1248(17) Å                 | a = 90°.         |
|                        | b = 8.3530(8) Å                   | b = 101.290(2)°. |
|                        | c = 25.014(3) Å                   | g = 90°.         |
| Volume                 | 3303.9(6) Å <sup>3</sup>          |                  |
| Z                      | 8                                 |                  |
| Density (calculated)   | 1.188 Mg/m <sup>3</sup>           |                  |
| Absorption coefficient | 0.069 mm <sup>-1</sup>            |                  |



|                                   |                                             |
|-----------------------------------|---------------------------------------------|
| F(000)                            | 1248                                        |
| Crystal size                      | 0.50 x 0.50 x 0.50 mm <sup>3</sup>          |
| Theta range for data collection   | 1.66 to 25.50°.                             |
| Index ranges                      | -9<=h<=19, -10<=k<=10, -30<=l<=28           |
| Reflections collected             | 8599                                        |
| Independent reflections           | 3059 [R(int) = 0.0278]                      |
| Completeness to theta = 25.50°    | 100.0 %                                     |
| Absorption correction             | Empirical                                   |
| Max. and min. transmission        | 0.9665 and 0.9665                           |
| Refinement method                 | Full-matrix least-squares on F <sup>2</sup> |
| Data / restraints / parameters    | 3059 / 0 / 208                              |
| Goodness-of-fit on F <sup>2</sup> | 1.050                                       |
| Final R indices [I>2sigma(I)]     | R1 = 0.0421, wR2 = 0.1091                   |
| R indices (all data)              | R1 = 0.0541, wR2 = 0.1144                   |
| Largest diff. peak and hole       | 0.135 and -0.135 e.Å <sup>-3</sup>          |

**Table S2.** Atomic coordinates (x 10<sup>4</sup>) and equivalent isotropic displacement parameters (Å<sup>2</sup> x 10<sup>3</sup>) for (Z)-**3ac**. U(eq) is defined as one third of the trace of the orthogonalized U<sup>ij</sup> tensor.

|       | x       | y       | z       | U(eq) |
|-------|---------|---------|---------|-------|
| C(2)  | 881(1)  | 5970(2) | 814(1)  | 55(1) |
| C(3)  | 1392(1) | 7286(2) | 639(1)  | 55(1) |
| C(9)  | 1162(1) | 4539(2) | 1032(1) | 55(1) |
| C(17) | 2578(1) | 3715(1) | 1622(1) | 54(1) |
| C(7)  | 2626(1) | 8966(2) | 779(1)  | 70(1) |
| C(1)  | -15(1)  | 6301(2) | 704(1)  | 64(1) |
| C(10) | 591(1)  | 3420(2) | 1246(1) | 58(1) |
| C(18) | 3249(1) | 2652(2) | 1699(1) | 65(1) |
| C(16) | 2053(1) | 3969(2) | 1057(1) | 62(1) |
| C(11) | 91(1)   | 3954(2) | 1602(1) | 71(1) |
| C(8)  | 2163(1) | 7744(2) | 950(1)  | 64(1) |
| C(6)  | 2319(1) | 9774(2) | 306(1)  | 69(1) |
| N(1)  | -714(1) | 6636(2) | 588(1)  | 90(1) |
| C(22) | 2443(1) | 4567(2) | 2068(1) | 68(1) |
| C(15) | 550(1)  | 1805(2) | 1105(1) | 75(1) |
| C(4)  | 1089(1) | 8127(2) | 164(1)  | 68(1) |

|       |         |         |         |       |
|-------|---------|---------|---------|-------|
| C(5)  | 1549(1) | 9363(2) | 0(1)    | 75(1) |
| C(13) | -478(1) | 1349(3) | 1661(1) | 99(1) |
| C(19) | 3763(1) | 2468(2) | 2203(1) | 78(1) |
| C(12) | -439(1) | 2926(2) | 1808(1) | 87(1) |
| C(20) | 3627(1) | 3332(2) | 2638(1) | 79(1) |
| C(14) | 10(1)   | 792(2)  | 1311(1) | 97(1) |
| C(21) | 2963(1) | 4381(2) | 2572(1) | 80(1) |

---

**Table S3.** Bond lengths [Å] and angles [°] for (Z)-**3ac**.

---

|              |            |
|--------------|------------|
| C(2)-C(9)    | 1.3548(18) |
| C(2)-C(1)    | 1.443(2)   |
| C(2)-C(3)    | 1.4904(17) |
| C(3)-C(4)    | 1.3841(18) |
| C(3)-C(8)    | 1.3844(18) |
| C(9)-C(10)   | 1.4837(18) |
| C(9)-C(16)   | 1.5037(19) |
| C(17)-C(22)  | 1.3754(18) |
| C(17)-C(18)  | 1.3839(19) |
| C(17)-C(16)  | 1.5131(19) |
| C(7)-C(6)    | 1.368(2)   |
| C(7)-C(8)    | 1.3805(19) |
| C(7)-H(7)    | 0.9300     |
| C(1)-N(1)    | 1.1432(18) |
| C(10)-C(11)  | 1.388(2)   |
| C(10)-C(15)  | 1.392(2)   |
| C(18)-C(19)  | 1.376(2)   |
| C(18)-H(18)  | 0.9300     |
| C(16)-H(16A) | 0.9700     |
| C(16)-H(16B) | 0.9700     |
| C(11)-C(12)  | 1.380(2)   |
| C(11)-H(11)  | 0.9300     |
| C(8)-H(8)    | 0.9300     |
| C(6)-C(5)    | 1.368(2)   |
| C(6)-H(6)    | 0.9300     |

|             |          |
|-------------|----------|
| C(22)-C(21) | 1.380(2) |
| C(22)-H(22) | 0.9300   |
| C(15)-C(14) | 1.384(3) |
| C(15)-H(15) | 0.9300   |
| C(4)-C(5)   | 1.380(2) |
| C(4)-H(4)   | 0.9300   |
| C(5)-H(5)   | 0.9300   |
| C(13)-C(12) | 1.366(3) |
| C(13)-C(14) | 1.369(3) |
| C(13)-H(13) | 0.9300   |
| C(19)-C(20) | 1.360(2) |
| C(19)-H(19) | 0.9300   |
| C(12)-H(12) | 0.9300   |
| C(20)-C(21) | 1.368(2) |
| C(20)-H(20) | 0.9300   |
| C(14)-H(14) | 0.9300   |
| C(21)-H(21) | 0.9300   |

|                   |            |
|-------------------|------------|
| C(9)-C(2)-C(1)    | 119.28(12) |
| C(9)-C(2)-C(3)    | 127.43(12) |
| C(1)-C(2)-C(3)    | 113.23(11) |
| C(4)-C(3)-C(8)    | 117.98(12) |
| C(4)-C(3)-C(2)    | 120.16(12) |
| C(8)-C(3)-C(2)    | 121.82(12) |
| C(2)-C(9)-C(10)   | 121.25(12) |
| C(2)-C(9)-C(16)   | 122.56(12) |
| C(10)-C(9)-C(16)  | 116.16(11) |
| C(22)-C(17)-C(18) | 117.54(13) |
| C(22)-C(17)-C(16) | 122.48(12) |
| C(18)-C(17)-C(16) | 119.90(12) |
| C(6)-C(7)-C(8)    | 120.36(13) |
| C(6)-C(7)-H(7)    | 119.8      |
| C(8)-C(7)-H(7)    | 119.8      |
| N(1)-C(1)-C(2)    | 174.96(15) |
| C(11)-C(10)-C(15) | 117.97(14) |
| C(11)-C(10)-C(9)  | 120.57(12) |

|                     |            |
|---------------------|------------|
| C(15)-C(10)-C(9)    | 121.45(14) |
| C(19)-C(18)-C(17)   | 120.92(14) |
| C(19)-C(18)-H(18)   | 119.5      |
| C(17)-C(18)-H(18)   | 119.5      |
| C(9)-C(16)-C(17)    | 115.96(11) |
| C(9)-C(16)-H(16A)   | 108.3      |
| C(17)-C(16)-H(16A)  | 108.3      |
| C(9)-C(16)-H(16B)   | 108.3      |
| C(17)-C(16)-H(16B)  | 108.3      |
| H(16A)-C(16)-H(16B) | 107.4      |
| C(12)-C(11)-C(10)   | 121.35(16) |
| C(12)-C(11)-H(11)   | 119.3      |
| C(10)-C(11)-H(11)   | 119.3      |
| C(7)-C(8)-C(3)      | 120.77(13) |
| C(7)-C(8)-H(8)      | 119.6      |
| C(3)-C(8)-H(8)      | 119.6      |
| C(5)-C(6)-C(7)      | 119.65(14) |
| C(5)-C(6)-H(6)      | 120.2      |
| C(7)-C(6)-H(6)      | 120.2      |
| C(17)-C(22)-C(21)   | 121.29(14) |
| C(17)-C(22)-H(22)   | 119.4      |
| C(21)-C(22)-H(22)   | 119.4      |
| C(14)-C(15)-C(10)   | 120.03(17) |
| C(14)-C(15)-H(15)   | 120.0      |
| C(10)-C(15)-H(15)   | 120.0      |
| C(5)-C(4)-C(3)      | 120.89(13) |
| C(5)-C(4)-H(4)      | 119.6      |
| C(3)-C(4)-H(4)      | 119.6      |
| C(6)-C(5)-C(4)      | 120.29(14) |
| C(6)-C(5)-H(5)      | 119.9      |
| C(4)-C(5)-H(5)      | 119.9      |
| C(12)-C(13)-C(14)   | 119.90(17) |
| C(12)-C(13)-H(13)   | 120.1      |
| C(14)-C(13)-H(13)   | 120.1      |
| C(20)-C(19)-C(18)   | 120.81(15) |
| C(20)-C(19)-H(19)   | 119.6      |

|                   |            |
|-------------------|------------|
| C(18)-C(19)-H(19) | 119.6      |
| C(13)-C(12)-C(11) | 119.90(19) |
| C(13)-C(12)-H(12) | 120.1      |
| C(11)-C(12)-H(12) | 120.1      |
| C(19)-C(20)-C(21) | 119.21(15) |
| C(19)-C(20)-H(20) | 120.4      |
| C(21)-C(20)-H(20) | 120.4      |
| C(13)-C(14)-C(15) | 120.84(17) |
| C(13)-C(14)-H(14) | 119.6      |
| C(15)-C(14)-H(14) | 119.6      |
| C(20)-C(21)-C(22) | 120.23(15) |
| C(20)-C(21)-H(21) | 119.9      |
| C(22)-C(21)-H(21) | 119.9      |

---

Symmetry transformations used to generate equivalent atoms:

**Table S4.** Anisotropic displacement parameters ( $\text{\AA}^2 \times 10^3$ ) for (Z)-**3ac**. The anisotropic displacement factor exponent takes the form:  $-2p^2 [ h^2 a^* 2U^{11} + \dots + 2 h k a^* b^* U^{12} ]$

|       | U11   | U22   | U33    | U23   | U13   | U12    |
|-------|-------|-------|--------|-------|-------|--------|
| C(2)  | 59(1) | 54(1) | 53(1)  | -1(1) | 12(1) | -8(1)  |
| C(3)  | 59(1) | 54(1) | 53(1)  | -1(1) | 15(1) | -3(1)  |
| C(9)  | 65(1) | 52(1) | 48(1)  | -5(1) | 10(1) | -8(1)  |
| C(17) | 55(1) | 44(1) | 64(1)  | 0(1)  | 19(1) | -6(1)  |
| C(7)  | 65(1) | 69(1) | 74(1)  | -3(1) | 11(1) | -18(1) |
| C(1)  | 61(1) | 56(1) | 75(1)  | 9(1)  | 14(1) | -10(1) |
| C(10) | 64(1) | 52(1) | 54(1)  | 3(1)  | 0(1)  | -10(1) |
| C(18) | 58(1) | 54(1) | 86(1)  | -7(1) | 21(1) | -3(1)  |
| C(16) | 72(1) | 57(1) | 60(1)  | -5(1) | 20(1) | 0(1)   |
| C(11) | 78(1) | 68(1) | 68(1)  | 3(1)  | 16(1) | -20(1) |
| C(8)  | 68(1) | 63(1) | 58(1)  | 3(1)  | 7(1)  | -10(1) |
| C(6)  | 76(1) | 64(1) | 74(1)  | 3(1)  | 29(1) | -15(1) |
| N(1)  | 65(1) | 84(1) | 122(1) | 23(1) | 21(1) | -5(1)  |
| C(22) | 75(1) | 65(1) | 63(1)  | -1(1) | 14(1) | 13(1)  |
| C(15) | 80(1) | 54(1) | 83(1)  | 1(1)  | -5(1) | -7(1)  |

|       |        |        |        |       |        |        |
|-------|--------|--------|--------|-------|--------|--------|
| C(4)  | 62(1)  | 75(1)  | 64(1)  | 11(1) | 7(1)   | -11(1) |
| C(5)  | 82(1)  | 79(1)  | 65(1)  | 19(1) | 14(1)  | -9(1)  |
| C(13) | 86(1)  | 91(1)  | 107(1) | 41(1) | -10(1) | -36(1) |
| C(19) | 58(1)  | 66(1)  | 105(1) | 6(1)  | 7(1)   | 4(1)   |
| C(12) | 80(1)  | 101(1) | 78(1)  | 20(1) | 12(1)  | -29(1) |
| C(20) | 75(1)  | 75(1)  | 80(1)  | 11(1) | -2(1)  | -7(1)  |
| C(14) | 103(1) | 54(1)  | 117(2) | 17(1) | -23(1) | -22(1) |
| C(21) | 95(1)  | 81(1)  | 64(1)  | -5(1) | 12(1)  | 4(1)   |

**Table S5.** Hydrogen coordinates ( $\times 10^4$ ) and isotropic displacement parameters ( $\text{\AA}^2 \times 10^3$ ) for (Z)-**3ac**.

|        | x    | y     | z    | U(eq) |
|--------|------|-------|------|-------|
| H(7)   | 3150 | 9242  | 987  | 84    |
| H(18)  | 3353 | 2053  | 1405 | 78    |
| H(16A) | 2341 | 4741  | 868  | 74    |
| H(16B) | 2031 | 2966  | 859  | 74    |
| H(11)  | 113  | 5026  | 1704 | 85    |
| H(8)   | 2371 | 7223  | 1277 | 76    |
| H(6)   | 2632 | 10598 | 193  | 83    |
| H(22)  | 1993 | 5282  | 2028 | 81    |
| H(15)  | 885  | 1407  | 872  | 90    |
| H(4)   | 567  | 7856  | -47  | 81    |
| H(5)   | 1336 | 9918  | -319 | 90    |
| H(13)  | -836 | 655   | 1799 | 118   |
| H(19)  | 4209 | 1744  | 2246 | 93    |
| H(12)  | -768 | 3307  | 2047 | 104   |
| H(20)  | 3981 | 3211  | 2977 | 95    |
| H(14)  | -22  | -281  | 1210 | 117   |
| H(21)  | 2862 | 4972  | 2868 | 97    |

## References

1. A. B. Pangborn, M. A. Giardello, R. H. Grubbs, R. K. Rosen and F. J. Timmers, *Organometallics* **1996**, *15*, 1518.

2. H. Tomori, J. M. Fox and S. L. Buchwald, *J. Org. Chem.* **2000**, *65*, 5334.
3. X. Huang, K. W. Anderson, D. Zim, L. Jiang, A. Klapars and S. L. Buchwald, *J. Am. Chem. Soc.* **2003**, *125*, 6653.
4. A. Guijarro and M. Yus, *Tetrahedron* **1995**, *51*, 231.
5. C. G. Caldwell, I. Kopka, M. L. Hammond and R.A. Zambias, U.S. Patent, 4746669.
6. (a) H. Ohta, N. Kobayashi and K. Ozaki, *J. Org. Chem.* **1989**, *54*, 1802. (b) C. Czekelius and E. M. Carreira, *Angew. Chem. Int. Ed.* **2003**, *42*, 4793. (c) C. Czekelius and E. M. Carreira, *Angew. Chem. Int. Ed.* **2005**, *44*, 612.
7. S. Takeuchi, A. Ohira, N. Miyoshi, H. Mashio and Y. Ohgo, *Tetrahedron: Asymmetry* **1994**, *5*, 1763.
